# Supplementary material for: Anacardium Occidentale L. Leaf Extracts Protect Against Glutamate/H2O2-Induced Oxidative Toxicity and Induce Neurite Outgrowth: The Involvement of SIRT1/Nrf2 Signaling Pathway and Teneurin 4 Transmembrane Protein
Source: PubMed Central journal article supplement (PMC8114061; doi:10.3389/fphar.2021.627738), 2021-04-23

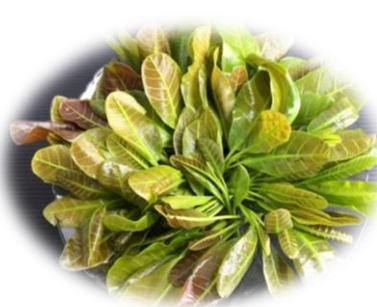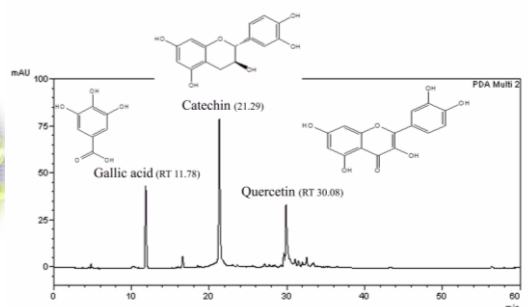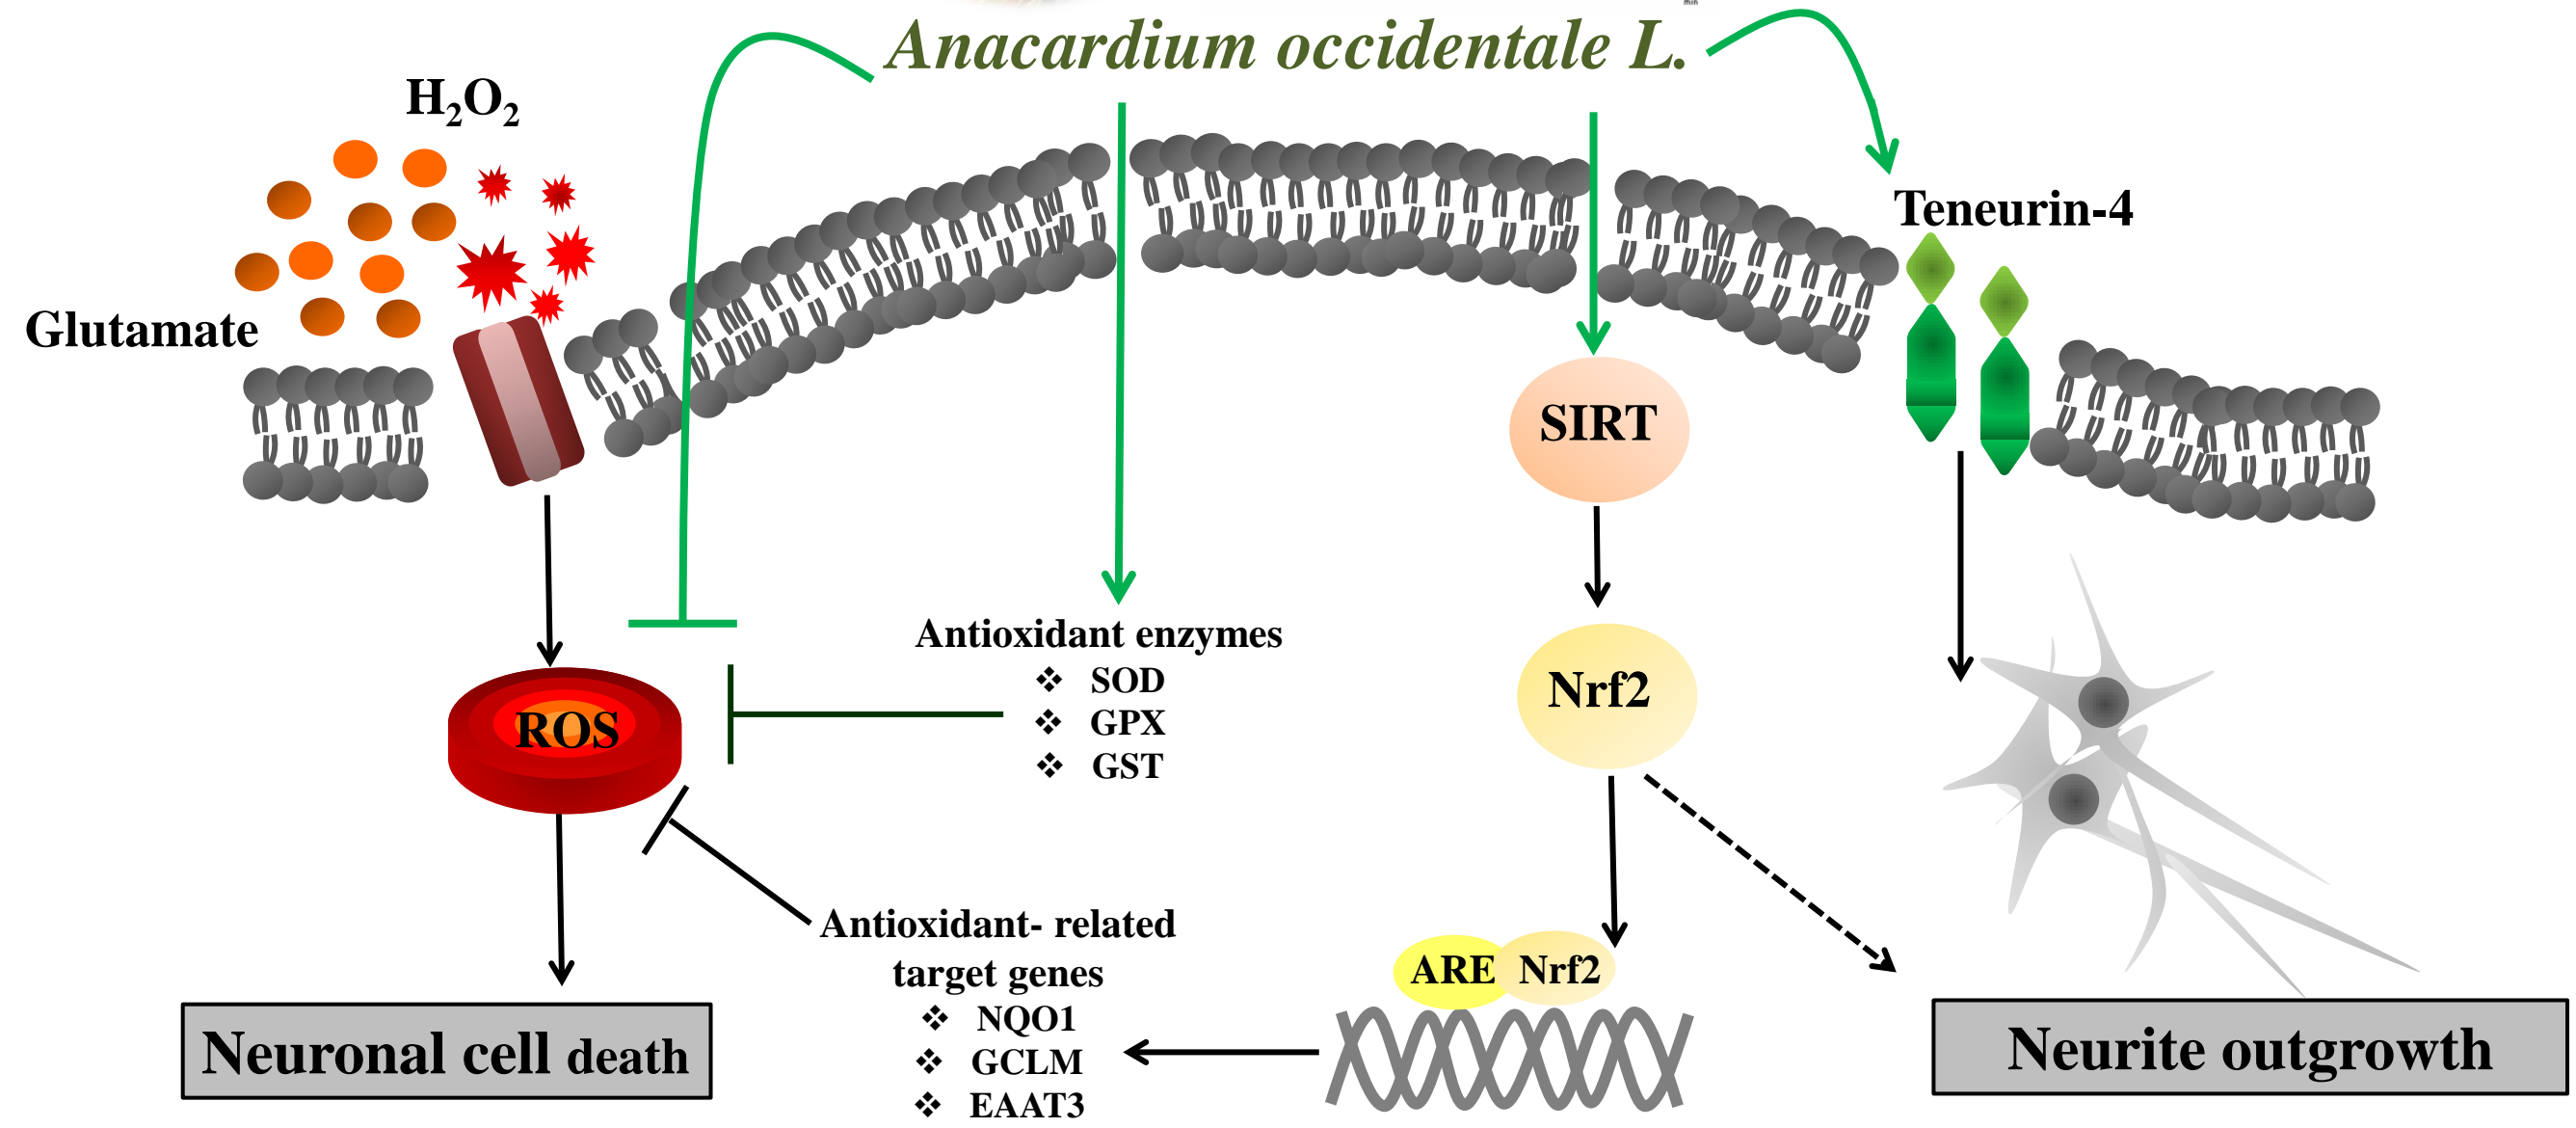

Supplement: Image1.pdf [file Image1.pdf]
